# Supplementary material
Source: PubMed Central journal article supplement (PMC3038462)
Supplement: supp_gzq111_gzq111supp_table.pdf [file supp_gzq111_gzq111supp_table.pdf]

**Supplemental Table 1. Characteristics of BoNT scFv.** Clone name, serotype

specificity, domain epitope, V<sub>H</sub> CDR3 sequence, and equilibrium dissociation constant (K<sub>D</sub>) for BoNT/A, BoNT/B, and BoNT/E are shown. K<sub>D</sub> measured on yeast displayed scFv. L<sub>C</sub> = toxin light chain; H<sub>N</sub> = toxin translocation domain; H<sub>C</sub> = toxin binding domain; NB = no binding.

| mAb name | Serotype specificity | Epitope           | V <sub>H</sub> CDR3 Sequence | BoNT K <sub>D</sub> by FACS (x 10 <sup>-9</sup> M <sup>-1</sup> ) |        |        |
|----------|----------------------|-------------------|------------------------------|-------------------------------------------------------------------|--------|--------|
|          |                      |                   |                              | BoNT/A                                                            | BoNT/B | BoNT/E |
| 5A20     | BoNT/A               | LC                | EASFGWSYLGHDDAFDI            | 0.40                                                              | NB     | NB     |
| ING2     | BoNT/A               | LC                | DPYYSYMDV                    | 0.24                                                              | NB     | NB     |
| 4A1      | BoNT/A               | H <sub>N</sub>    | DPGWIYSDTSAAGWFDP            | 7.4                                                               | NB     | NB     |
| ING1     | BoNT/A               | LC-H <sub>N</sub> | RTKYCSSLSCFAGFDS             | 1.14                                                              | NB     | NB     |
| 3D12     | BoNT/A               | H <sub>C</sub>    | EPDWLLWGDRGALDV              | 3.3                                                               | NB     | NB     |
| C25      | BoNT/A               | H <sub>C</sub>    | YRYDDAMDY                    | 1.5                                                               | NB     | NB     |
| S25      | BoNT/A               | H <sub>C</sub>    | GLYNGFWYFDV                  | 31.7                                                              | NB     | NB     |
| 4B6      | BoNT/B               | LC                | HDSRYKYFYFGMDV               | NB                                                                | 2.7    | NB     |
| 4B7      | BoNT/B               | LC                | MSGRSYSQYYFDS                | NB                                                                | 29.4   | NB     |
| 1B10     | BoNT/B               | LC                | DLTRFHDTTFGVFEM              | NB                                                                | 11.2   | NB     |
| 4B19     | BoNT/B               | LC                | EWTQLWSPYDY                  | NB                                                                | 6.45   | NB     |
| 1B22     | BoNT/B               | LC                | TAFYYENTGPIRCYLDF            | NB                                                                | 0.52   | NB     |
| 2B23     | BoNT/B               | LC                | ALVGRYDISTGYRPMDS            | NB                                                                | 0.08   | NB     |
| 2B24     | BoNT/B               | LC                | DGPMAAIPFYFDF                | NB                                                                | 0.79   | NB     |
| 2B25     | BoNT/B               | LC                | GVPIYDSSGTYRGTYFDY           | NB                                                                | 0.95   | NB     |
| 2B27     | BoNT/B               | LC                | RRLGSPYYFDY                  | NB                                                                | 1.9    | NB     |
| 2B29     | BoNT/B               | LC                | GNPQYDTSGSYTGLYFDF           | NB                                                                | 1.11   | NB     |
| 4B3      | BoNT/B               | H <sub>N</sub>    | DILYYHDSSDYWGRGHFYMDV        | NB                                                                | 26.7   | NB     |
| 1B11     | BoNT/B               | H <sub>N</sub>    | DRYPIDCSGGSCFSYGMDV          | NB                                                                | 2.6    | NB     |
| 1B18     | BoNT/B               | H <sub>N</sub>    | LEWGGRNGWVSP                 | 6.2                                                               | 7.3    | NB     |

|      |        |                |                   |      |      |      |
|------|--------|----------------|-------------------|------|------|------|
| 4B1  | BoNT/B | H <sub>C</sub> | DKRTYEYNWNSLWF    | NB   | 1.08 | NB   |
| 4B5  | BoNT/B | H <sub>C</sub> | MRGYSSWHYSYYYVMDV | NB   | 59.6 | NB   |
| 1B12 | BoNT/B | H <sub>C</sub> | DRSHYGDYVGYLDY    | NB   | 1.17 | NB   |
| 1B14 | BoNT/B | H <sub>C</sub> | SSIVGAPYGMDV      | NB   | 0.98 | NB   |
| 2B30 | BoNT/B | H <sub>C</sub> | DVSEYGDYVGHFDY    | NB   | 0.37 | NB   |
| 3E1  | BoNT/E | LC             | DQGEYTVGMLLYYAMDV | NB   | NB   | 6.2  |
| 4E16 | BoNT/E | LC             | HTSGWSSGGAFDI     | NB   | NB   | 0.2  |
| 3E3  | BoNT/E | LC             | DEMVGILVYYGMDV    | NB   | NB   | 7.8  |
| 3E4  | BoNT/E | LC             | DSYHSRLAAFDI      | NB   | NB   | 4.7  |
| 3E5  | BoNT/E | LC             | VASRYHDVLTGFDI    | NB   | NB   | 4.9  |
| 4E11 | BoNT/E | LC             | GPPGRPNDAFDI      | NB   | NB   | 14.4 |
| 3E2  | BoNT/E | H <sub>N</sub> | DQGEYTVGMLLYYAMDV | NB   | NB   | 9.3  |
| 3E6  | BoNT/E | H <sub>N</sub> | ARLCTSTSCYWTFDP   | NB   | NB   | 15.4 |
| 4E17 | BoNT/E | H <sub>N</sub> | LQWGGYNGWLSP      | 1.34 | 30   | 14.1 |
| 4E13 | BoNT/E | H <sub>C</sub> | GLSKADLFGMDV      | NB   | NB   | 10.0 |
